# Supplementary material for: Development of a Biomarker-Based Diagnostic Algorithm for Posttraumatic Syndrome after Physical Injury: Design of the BioPTS Study
Source: PubMed Central journal article supplement — Psychiatry Investig. 2017 Jul 11;14(4):513–7. doi: 10.4306/pi.2017.14.4.513 (PMC5561411; doi:10.4306/pi.2017.14.4.513), 2017-07-11
Supplement: pi-14-513-s001.pdf [file pi-14-513-s001.pdf]

**Supplementary Table 1.** Previous studies on the epidemiology of posttraumatic syndrome (PTS) following severe physical injury

| Author (year)                           | Design         | PTS                       | Subject                                       | Findings                                                                            |
|-----------------------------------------|----------------|---------------------------|-----------------------------------------------|-------------------------------------------------------------------------------------|
| Shalev et al. (1996) <sup>5</sup>       | Prospective    | PTSD                      | Injured trauma survivors                      | PTSD diagnosis after trauma: 25.5%                                                  |
| Blanchard et al. (1996) <sup>9</sup>    | Prospective    | PTSD                      | Injured trauma (motor vehicle) survivors      | 1 year course and risk factor                                                       |
| McFarlane (2000) <sup>4</sup>           | Review article | PTSD                      | Injured trauma survivors                      | Longitudinal course and risk factor                                                 |
| Zatzick et al. (2007) <sup>6</sup>      | Retrospective  | PTSD                      | Injured trauma survivors, Nationwide US study | 23% of trauma survivors had PTSD symptoms 1 year after hospitalization              |
| Bryant et al. (2010) <sup>2</sup>       | Prospective    | Depression, anxiety, PTSD | Injured trauma survivors,                     | Psychiatric disorders 12months after trauma injury: 31%                             |
| Shih et al. (2010) <sup>10</sup>        | Prospective    | PTSD, MDD                 | Injured trauma survivors                      | Symptoms of PTSD and depression after trauma injury: 6 month and 12 month follow up |
| Tracy et al. (2011) <sup>46</sup>       | Retrospective  | PTSD, Depression          | Natural disaster survivors                    | Differences in the determinants between PTSD and depression                         |
| Vu et al. (2012) <sup>48</sup>          | Prospective    | Depression                | Natural disaster survivors                    | Depression diagnosis after disaster: 8.5%                                           |
| Tang et al. (2014) <sup>49</sup>        | Prospective    | Depression                | Natural disaster survivors                    | Prevalence of depression after natural disasters: 5.8–54%                           |
| Schweininger et al. (2015) <sup>3</sup> | Prospective    | Depression, anxiety, PTSD | Injured trauma survivors                      | Relationship between psychiatric disorder and disability                            |
| Bryant et al. (2015) <sup>47</sup>      | Prospective    | PTSD                      | Injured trauma survivors                      | Five trajectories of PTSD                                                           |

PTSD: posttraumatic stress disorder, MDD: major depressive disorder
