# Supplementary material for: Development of a Biomarker-Based Diagnostic Algorithm for Posttraumatic Syndrome after Physical Injury: Design of the BioPTS Study
Source: PubMed Central journal article supplement — Psychiatry Investig. 2017 Jul 11;14(4):513–7. doi: 10.4306/pi.2017.14.4.513 (PMC5561411; doi:10.4306/pi.2017.14.4.513), 2017-07-11
Supplement: pi-14-513-s002.pdf [file pi-14-513-s002.pdf]

**Supplementary Table 2.** Previous studies on the biomarkers of posttraumatic syndrome (PTS) following severe physical injury

| Author (year)                         | Design          | PTS               | Subject                                  | Findings                                          |
|---------------------------------------|-----------------|-------------------|------------------------------------------|---------------------------------------------------|
| Shalev et al. (1998) <sup>21</sup>    | Prospective     | PTSD              | Injured trauma survivors                 | Heart rate response after trauma                  |
| Delahanty et al. (2000) <sup>20</sup> | Prospective     | PTSD              | Injured trauma (motor vehicle) survivors | Urinary cortisol response after traumatic         |
| Binder et al. (2008) <sup>50</sup>    | Cross-sectional | PTSD, child abuse | Predictor of Adult PTSD symptom          | FKBP5 gene interacted with child abuse            |
| Yehuda et al. (2009) <sup>51</sup>    | Cross-sectional | PTSD              | Terrorism (World Trade Center Attacks)   | Gene expression patterns among PTSD patients      |
| McFarlane et al. (2010) <sup>18</sup> | Prospective     | PTSD              | Injured trauma survivors                 | Urinary melatonin response after traumatic injury |
| McFarlane et al. (2011) <sup>19</sup> | Prospective     | PTSD              | Injured trauma survivors                 | Cortisol response following traumatic injury      |

PTSD: posttraumatic stress disorder
