# Supplementary material for: Development of a Biomarker-Based Diagnostic Algorithm for Posttraumatic Syndrome after Physical Injury: Design of the BioPTS Study
Source: PubMed Central journal article supplement — Psychiatry Investig. 2017 Jul 11;14(4):513–7. doi: 10.4306/pi.2017.14.4.513 (PMC5561411; doi:10.4306/pi.2017.14.4.513), 2017-07-11
Supplement: pi-14-513-s003.pdf [file pi-14-513-s003.pdf]

**Supplementary Table 3.** Schedule of assessments for the biomarker based diagnostic algorithm for posttraumatic stress syndrome (BioPTS) study

| Evaluation points<br>(time after physical injury) | Baseline<br>(within 1 month) | 2nd<br>(3 month) | 3rd<br>(6 month) | 4th<br>(12 month) | 5th<br>(24 month) |
|---------------------------------------------------|------------------------------|------------------|------------------|-------------------|-------------------|
| General evaluations                               |                              |                  |                  |                   |                   |
| Trauma related assessments                        | √                            |                  |                  |                   |                   |
| General health state                              | √                            |                  |                  |                   |                   |
| Socio-demographic characteristics                 | √                            |                  |                  |                   |                   |
| Psychiatric measurements                          |                              |                  |                  |                   |                   |
| Depression                                        | √                            | √                | √                | √                 | √                 |
| Anxiety                                           | √                            | √                | √                | √                 | √                 |
| ASD & PTSD                                        | √                            | √                | √                | √                 | √                 |
| Cognitive function                                | √                            | √                | √                | √                 | √                 |
| Physical disabilities                             | √                            | √                | √                | √                 | √                 |
| Functional disabilities                           | √                            | √                | √                | √                 | √                 |
| Other psychosocial factors                        | √                            | √                | √                | √                 | √                 |
| Biomarker measurements                            |                              |                  |                  |                   |                   |
| Blood biomarker                                   | √                            |                  |                  |                   |                   |
| Electrophysiologic marker                         | √                            |                  |                  |                   |                   |
| Cortisol biomarker                                | √                            |                  |                  |                   |                   |
| Epigenetic biomarker                              | √                            |                  |                  |                   |                   |
| Genetic biomarker                                 | √                            |                  |                  |                   |                   |

ASD: acute stress disorder, PTSD: posttraumatic stress disorder
