# Supplementary material for: Development of a Biomarker-Based Diagnostic Algorithm for Posttraumatic Syndrome after Physical Injury: Design of the BioPTS Study
Source: PubMed Central journal article supplement — Psychiatry Investig. 2017 Jul 11;14(4):513–7. doi: 10.4306/pi.2017.14.4.513 (PMC5561411; doi:10.4306/pi.2017.14.4.513), 2017-07-11
Supplement: pi-14-513-s004.pdf [file pi-14-513-s004.pdf]

**Supplementary Table 4.** Detailed information on assessments and measurements for the biomarker based diagnostic algorithm for post-traumatic stress syndrome (BioPTS) study

| Topic                                             | Assessments and measurements                                                      | References                         | Methods |
|---------------------------------------------------|-----------------------------------------------------------------------------------|------------------------------------|---------|
| Trauma related assessments                        |                                                                                   |                                    |         |
| Type of injury                                    | Life event check list- korean version <sup>52</sup>                               | Bae et al. <sup>52</sup>           | SR      |
| Injury severity                                   | ISS <sup>22</sup>                                                                 | Baker et al. <sup>22</sup>         | Int     |
|                                                   | GCS <sup>23</sup>                                                                 | Teasdale and Jennett <sup>23</sup> | Int     |
| Traumatic condition                               | Presence+ symptoms of disease, ICU admission                                      | n/a                                | Int, GP |
| Subsequent traumatic events and stress            | Life experiences survey <sup>26</sup>                                             | Sarason et al. <sup>26</sup>       | SR      |
| General health state                              |                                                                                   |                                    |         |
| Body composition                                  | Body weight, Height                                                               | n/a                                | ME      |
| Blood pressure (BP)/Pulse rate                    | Systolic and diastolic BP assessment                                              | n/a                                | ME      |
| Menstruation (female)                             | Standard questions                                                                | n/a                                | ME      |
| Presence of 15 disease                            | Standard self-report questions+GP data                                            | n/a                                | Int, GP |
| Medication use                                    | Drug container observation+GP data                                                | n/a                                | Int, GP |
| Socio-demographic characteristics                 |                                                                                   |                                    |         |
| Age, gender, ethnicity                            | Standard questions                                                                | n/a                                | Int     |
| Partner+household status                          | Standard questions                                                                | n/a                                | Int     |
| Socio-economic status                             | Education, income, occupation                                                     | n/a                                | Int     |
| Religion                                          | Standard questions                                                                | n/a                                | Int     |
| Smoking                                           | Standard questions                                                                | n/a                                | SR      |
| Drinking                                          | Standard questions                                                                | n/a                                | SR      |
| Depression                                        |                                                                                   |                                    |         |
| Presence of depressive disorder (psychopathology) | MINI <sup>24</sup> : Major depression, minor depression                           | Sheehan et al. <sup>24</sup>       | Int     |
| Severity of depressive symptom                    | Hamilton Depression Rating Scale <sup>27</sup>                                    | Hamilton <sup>27</sup>             | Int     |
|                                                   | Hospital Anxiety and Depression Scale <sup>28</sup>                               | Zigmond and Snaith <sup>28</sup>   | SR      |
|                                                   | CGI-I, CGI-S <sup>29</sup>                                                        | Guy <sup>29</sup>                  | Int     |
| Presence of suicide idea                          | BPRS/SADS <sup>30</sup>                                                           | Patterson et al. <sup>30</sup>     | SR      |
| Life time suicide attempt                         | Past suicide attempt questionair                                                  | n/a                                | Int     |
| Anxiety                                           |                                                                                   |                                    |         |
| Presence of anxiety disorder (psychopathology)    | MINI <sup>24</sup> : Panic disorder, generalized anxiety disorder, social phobia, | Sheehan et al. <sup>24</sup>       | Int     |
| Severity of anxiety symptom                       | Hamilton Anxiety rating scale <sup>31</sup>                                       | Hamilton <sup>31</sup>             | Int     |
|                                                   | CGI-I, CGI-S <sup>29</sup>                                                        | Guy <sup>29</sup>                  | Int     |
|                                                   | Hospital Anxiety and Depression Scale <sup>28</sup>                               | Zigmond and Snaith <sup>28</sup>   | SR      |
| Abnormal illness behavior                         | Illness attitude scale                                                            | Kellner <sup>32</sup>              | SR      |
| ASD & PTSD                                        |                                                                                   |                                    |         |
| Presence of ASD & PTSD (psychopathology)          | Clinician administered PTSD scale-5 <sup>25</sup>                                 | Weather et al. <sup>25</sup>       | Int     |
|                                                   | Impact Event Scale-Revised <sup>34</sup>                                          | Weiss and Marmar <sup>34</sup>     | SR      |
| Severity of ASD & PTSD symptoms                   | Clinician administered PTSD scale-5 <sup>25</sup>                                 | Weather et al. <sup>25</sup>       | Int     |
| Cognitive function                                |                                                                                   |                                    |         |
| Presence of cognitive impairment                  | Korean Mini-Mental State Examination <sup>35</sup>                                | Kang et al. <sup>35</sup>          | Int     |
|                                                   | Perceived Deficits Questionnaire-Depression <sup>36</sup>                         | Kim et al. <sup>36</sup>           | SR      |
| Physical disabilities                             |                                                                                   |                                    |         |
| Activities of daily living and mobility           | Modified bathel index <sup>37</sup>                                               | Mahoney and Barthel <sup>37</sup>  | Int     |
| Health-related quality of life                    | EuroQol-5 dimension <sup>38</sup>                                                 | Rabin and De Charro <sup>38</sup>  | SR      |
| Functional disabilities                           |                                                                                   |                                    |         |
| Functional impairments                            |                                                                                   |                                    | SR      |
| Global rating of current functioning ranging      | Sheehan disability scale <sup>39</sup>                                            | Sheehan <sup>39</sup>              | Int     |
| Other psychosocial factors                        |                                                                                   |                                    |         |
| Previous psychiatric problem                      | SOFAS <sup>40</sup>                                                               | APA <sup>40</sup>                  |         |
| Chilhood trauma                                   | Standard questions                                                                | n/a                                | Int     |
| Social support                                    | Childhood adversity questionair <sup>41</sup>                                     | Kang et al. <sup>41</sup>          | SR      |
| Perception of stress                              | Multidimensional Scale of Perceived social support <sup>42</sup>                  | Zimet et al. <sup>42</sup>         | SR      |
| Stress coping ability                             | Perceived Stress scale <sup>44</sup>                                              | Cohen and Davidson <sup>44</sup>   | SR      |
| Personality                                       | Conner-Davidson Resilence Scale <sup>43</sup>                                     | Conner et al. <sup>43</sup>        | SR      |
| Blood biomarker                                   | Big Five Inventory <sup>45</sup>                                                  | John and Srivastata <sup>45</sup>  | SR      |
| Electrophysiologic biomarker                      |                                                                                   |                                    |         |
|                                                   | Blood sample                                                                      | n/a                                | Blood   |
|                                                   | Heart rate variability                                                            | n/a                                | ME      |
|                                                   | Systolic and diastolic BP, pulse rate                                             | n/a                                | ME      |
| Cortisol biomarker                                | Blood sample                                                                      | n/a                                | Blood   |
| Epigenetic biomarker                              | Blood sample                                                                      | n/a                                | Blood   |
| Genetic biomarker                                 | Blood sample                                                                      | n/a                                | Blood   |

SR: self-report, Int: interview, GP: data collection through general practitioner records, ME: medical examination, MINI: Mini International Neuropsychiatric Interview Version, BPRS/SADS: Brief Psychiatric Rating Scale/SAD PERSONS scale, CGI: Clinical Global Impression Scale, ASD: acute stress disorder, PTSD: post traumatic stress disorder, SR: self-report, Int: interview, SOFAS: Social and Occupational Functioning Assessment Scale
